# Supplementary material for: Brain serotonin synthesis capacity in obsessive-compulsive disorder: effects of cognitive behavioral therapy and sertraline
Source: PubMed Central journal article supplement (PMC5904107; doi:10.1038/s41398-018-0128-4), 2018-04-18
Supplement: 41398_2018_128_MOESM1_ESM.pdf [file 41398_2018_128_MOESM1_ESM.pdf]

**Supplementary Table 1. Patient Demographics by Clinical Response Subgroup.**

| Characteristic                                         | Responders / Partial-Responders ( <i>n</i> = 10) |                | Non-Responders ( <i>n</i> = 6) |                |
|--------------------------------------------------------|--------------------------------------------------|----------------|--------------------------------|----------------|
|                                                        | Pre                                              | Post           | Pre                            | Post           |
| Age, y                                                 |                                                  |                |                                |                |
| Mean (SD)                                              |                                                  | 35.8 (9.8)     |                                | 30.2 (8.6)     |
| Range                                                  |                                                  | 23-53          |                                | 18-40          |
| Treatment group                                        |                                                  | 4 CBT / 6 SSRI |                                | 4 CBT / 2 SSRI |
| Early-onset OCD ( $\leq 10$ y), No.                    |                                                  | 6              |                                | 4              |
| Predominant compulsion, No.                            |                                                  |                |                                |                |
| Washing                                                |                                                  | 6              |                                | 2              |
| Checking                                               |                                                  | 4              |                                | 4              |
| Lifetime history of MDE (2° to OCD symptoms), No.      |                                                  | 4              |                                | 1              |
| Past substance abuse, No.                              |                                                  | 0              |                                | 0              |
|                                                        | Pre                                              | Post           | Pre                            | Post           |
| Y-BOCS score, mean (SD)                                | 22.5 (3.3)                                       | 10.5 (4.2)     | 24.7 (6.9)                     | 23.3 (4.6)     |
| BDI score, mean (SD)                                   | 12.5 (9.8)                                       | 6.7 (8.0)      | 11.0 (6.9)                     | 8.2 (7.9)      |
| Plasma free tryptophan, mean (SD), nmol/L <sup>1</sup> | 10.1 (2.2)                                       | 10.0 (1.7)     | 10.1 (2.1)                     | 7.6 (0.8)      |
| Global K*, mean (SD), mL/g/min <sup>1</sup>            | 5.2 (1.6)                                        | 6.5 (1.8)      | 5.8 (0.4)                      | 5.4 (1.5)      |
| Intravenously injected, mean (SD), mCi <sup>1</sup>    | 9.5 (1.0)                                        | 9.7 (0.5)      | 9.7 (1.0)                      | 9.6 (0.6)      |

Abbreviations: OCD, obsessive-compulsive disorder; CBT, cognitive behavioral therapy; SSRI, selective serotonin re-uptake inhibitor; MDE, major depressive episode; Y-BOCS, Yale-Brown Obsessive Compulsive Scale; BDI, Beck Depression Inventory; No., number. Responders/partial-responders demonstrated a > 25% decrease in Y-BOCS score. <sup>1</sup> Data not included for 1 patient treated with CBT.

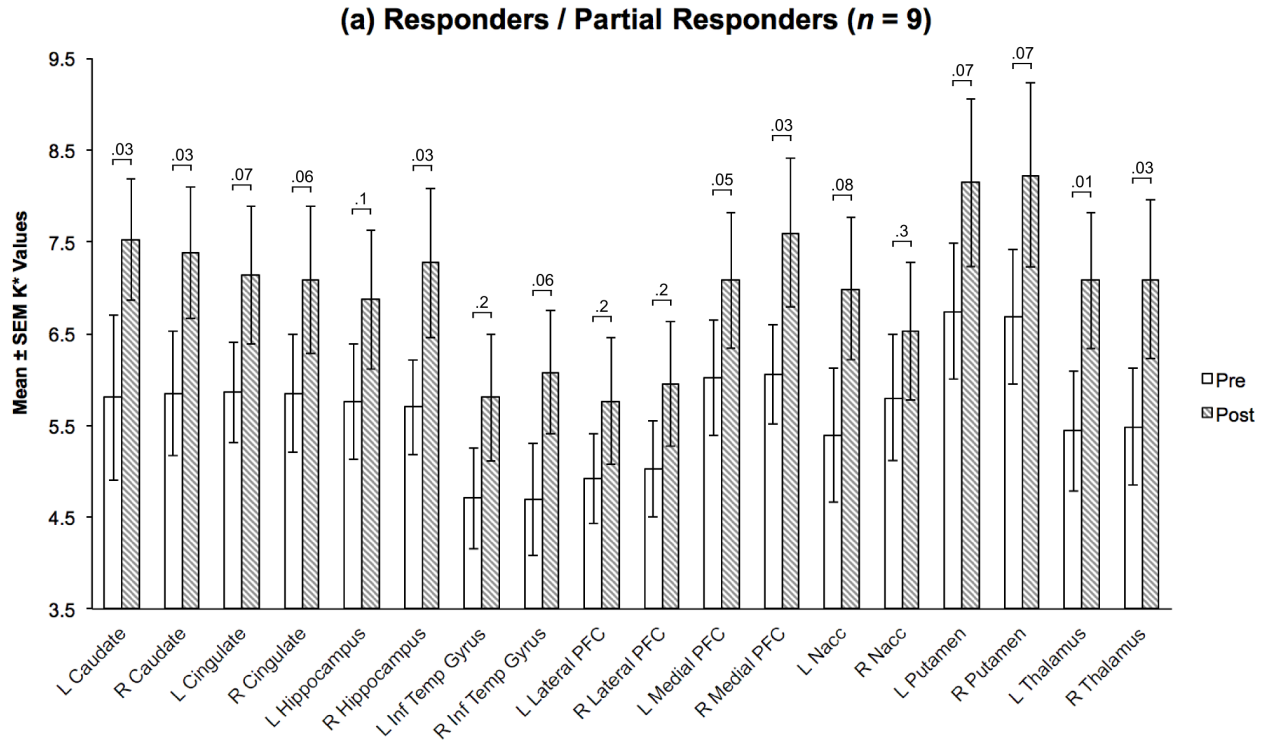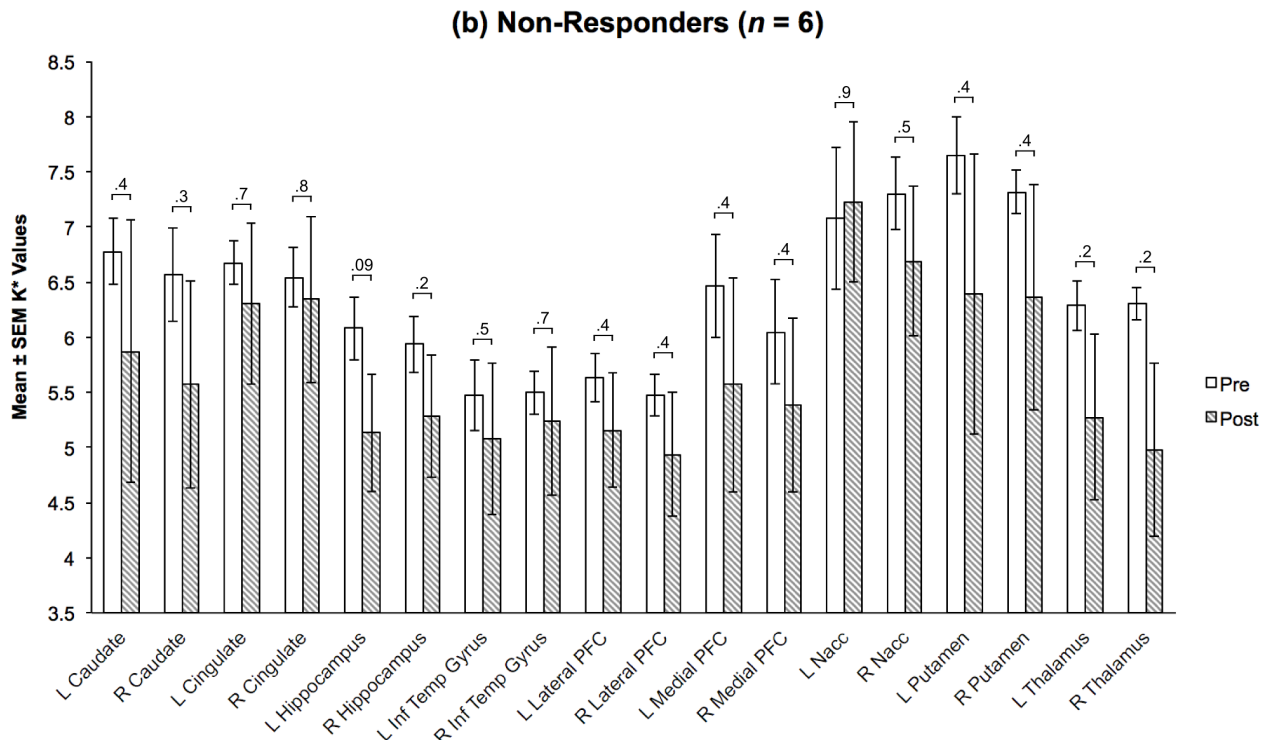

**Supplementary Figure 1.** Mean absolute K\* values of **(a)** responders/partial responders ( $n = 9$ ) and **(b)** non-responders ( $n = 6$ ) at 0 weeks (Pre) and 12 weeks (Post) of either CBT or SSRI

treatment in each region of interest. The uncorrected p-values from paired t-tests comparing pre- and post-treatment  $K^*$  values are indicated for each ROI. Abbreviations: L, Left; R, Right; Inf Temp, Inferior Temporal; PFC, Prefrontal Cortex; NAcc, Nucleus Accumbens.
